# Supplementary material for: Macrophage calcium reporter mice reveal immune cell communication in vitro and in vivo
Source: PubMed Central journal article supplement — Cell Rep Methods. 2021 Dec 13;1(8):100132. doi: 10.1016/j.crmeth.2021.100132 (PMC8786215; doi:10.1016/j.crmeth.2021.100132), 2021-12-13
Supplement: NIHMS1766150-supplement-1.pdf [file NIHMS1766150-supplement-1.pdf]

**Cell Reports Methods, Volume 1**

**Supplemental information**

**Macrophage calcium reporter mice reveal  
immune cell communication *in vitro* and *in vivo***

**Nika Taghdiri, David M. Calcagno, Zhenxing Fu, Kenneth Huang, Rainer H. Kohler, Ralph Weissleder, Todd P. Coleman, and Kevin R. King**

## SUPPLEMENTARY INFORMATION (SI)

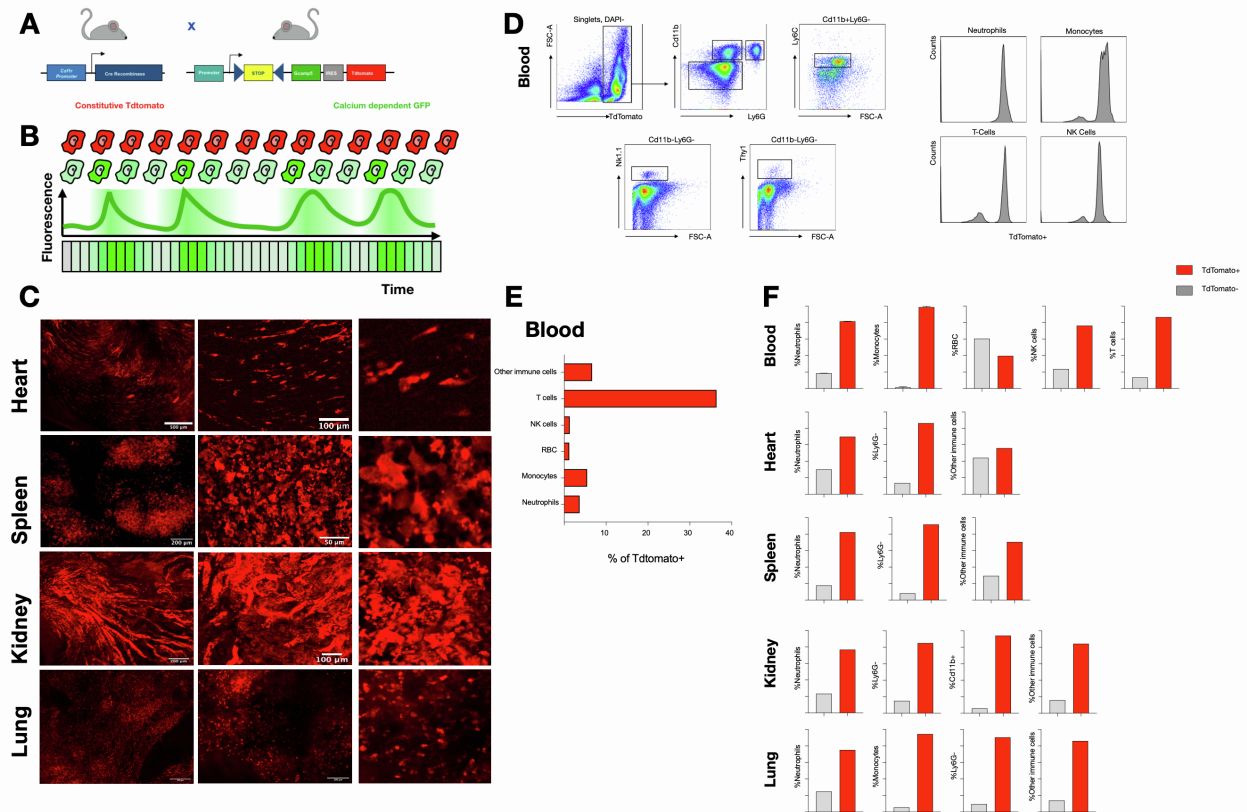

**Supplemental Figure 1 Design, construction, and characterization of a *Csfr1<sup>Cre</sup>GCaMP5<sup>fl</sup>* calcium reporter for non-destructive quantification of innate immune cell dynamics, Related to Figure 1.** A) Illustration of mouse breeding strategy. *Csfr1-cre* mice were crossed with floxed-STOP *GCaMP5* inducible reporter mice to create an innate immune cell specific reporter. B) Cartoon illustrating that *tdTomato* is constitutively expressed as a reference and dynamic calcium-dependent *GCaMP5* signals are quantified ratio-metrically C) Spatial distribution of *tdTomato*<sup>+</sup> cells in solid organs (heart, spleen, kidney, lung) at low (left), medium (middle), and high (right) magnification (scale bars from left to right, 500 $\mu$ m, 100 $\mu$ m and 10 $\mu$ m). D) Gating strategy for flow sorting of immune subsets. E) Percentage of total *tdTomato*<sup>high</sup> cells in the peripheral blood from the *Csfr1<sup>Cre</sup>GCaMP5<sup>fl</sup>* mouse. F) Percentage of each subset in each tissue compartment that is *tdTomato*<sup>+</sup>.

**A**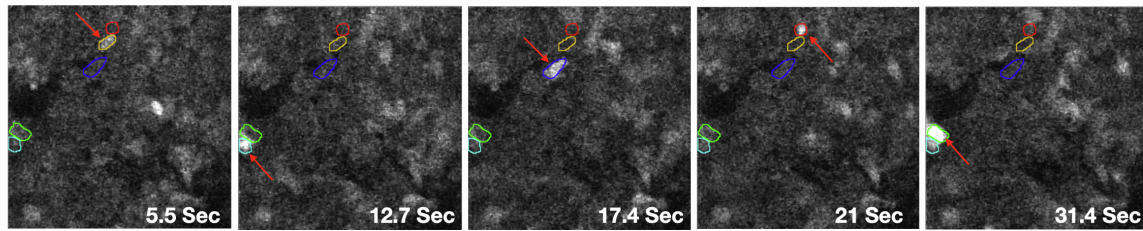**B**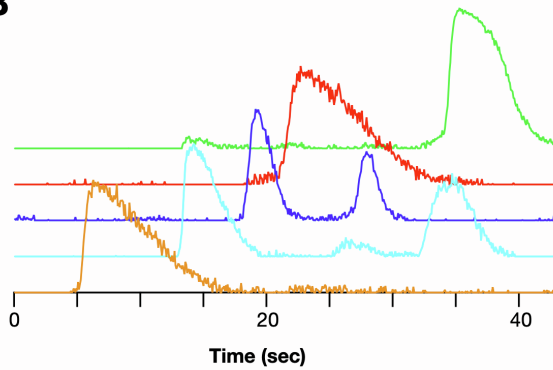**C**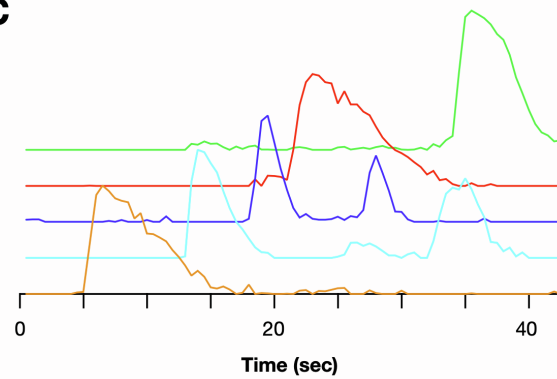

**Supplemental Figure 2  $Csf1r^{Cre}GCaMP5^{fl}$  sampling frequency determination, Related to Figure 2.** A) Calcium elevations were recorded from a population of cells at 15Hz. B) Quantification of calcium fluorescence versus time for multiple cells across time at 15Hz. C) Down-sampling was performed, and every 7<sup>th</sup> sample was plotted to show the similarity of calcium elevation tracings. This led to selection of 2Hz as the sampling frequency used throughout the manuscript.

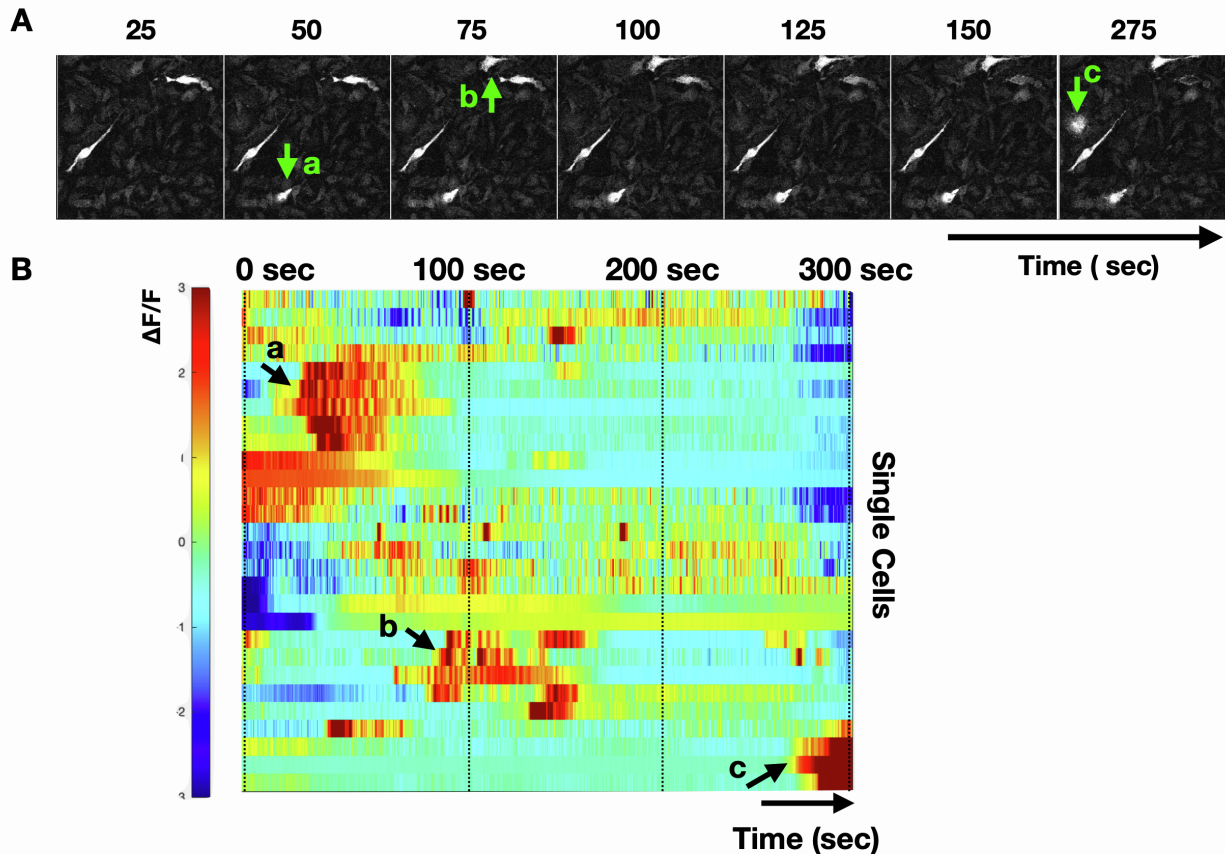

**Supplemental Figure 3 Example of  $Csf1r^{Cre}GCaMP5^{fl}$  macrophage calcium reporter dynamics following immunogenic double-stranded DNA stimulation in vitro, Related to Figure 2.** A) Montage of time-lapse imaging. Newly calcium-overloaded macrophages indicated in a, b, and c precipitate non-fatal calcium fluctuations in neighboring macrophages. B) Heatmap illustration of hierarchically clustered macrophage dynamics.

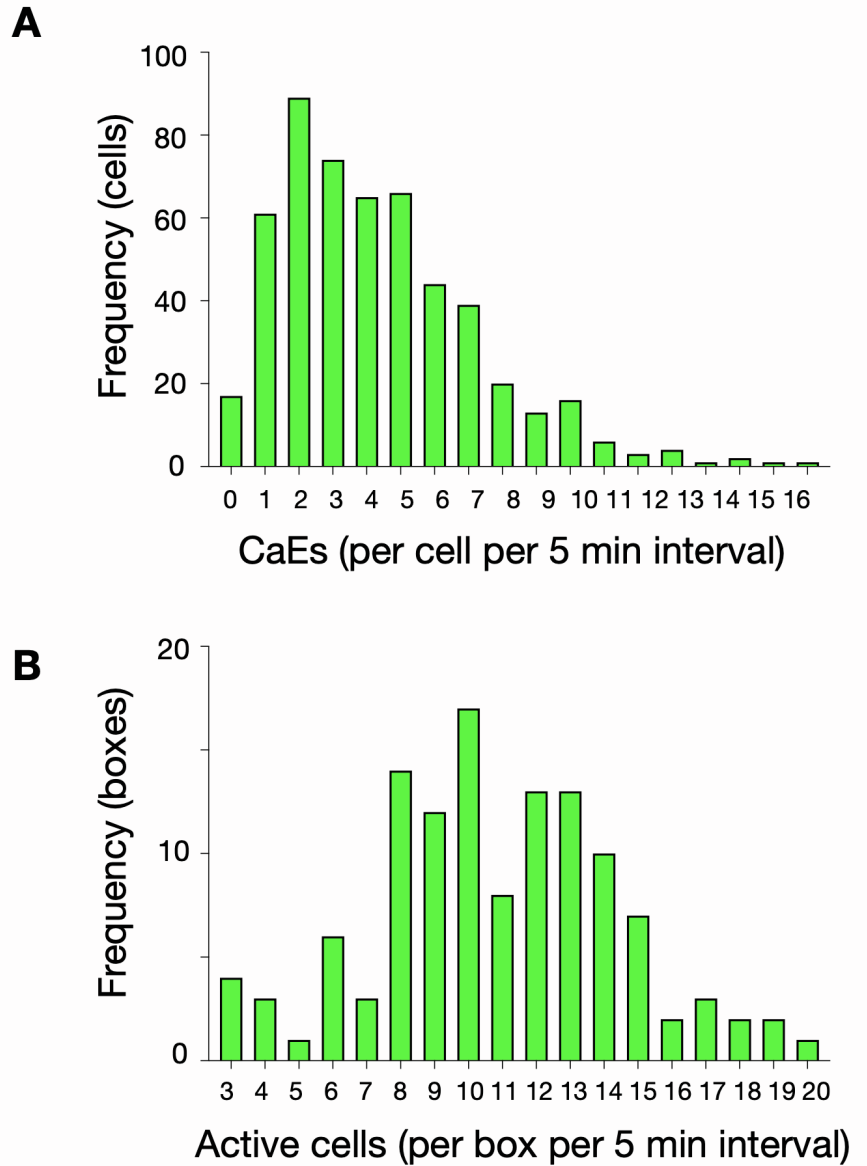

**Supplemental Figure 4 Histograms of in vivo  $Csf1^{Cre}GCaMP5^{fl}$  calcium reporter dynamics, Related to Figure 5.** A) Histogram illustrating distribution of number of calcium elevations per cell per 5-minute interval. B) Histogram illustrating distribution of number of active cells per box per 5-minute interval.

## SUPPLEMENTAL MOVIES

**M1a.** Csf1r<sup>Cre</sup>GCaMP5<sup>fl</sup> Macrophages – vehicle control stimulation, Related to Figure 1.

**M1b.** Csf1r<sup>Cre</sup>GCaMP5<sup>fl</sup> Macrophages - dsDNA stimulation, Related to Figure 1.

(0.008 Hz sampling)

*in vitro*

**M2.** Csf1r<sup>Cre</sup>GCaMP5<sup>fl</sup> macrophages - complexed dsDNA stimulation, Related to Figure 2.

(15 Hz sampling)

*in vitro*

**M3a.** Csf1r<sup>Cre</sup>GCaMP5<sup>fl</sup> macrophages - vehicle control stimulation, Related to Figure 2.

**M3b.** Csf1r<sup>Cre</sup>GCaMP5<sup>fl</sup> macrophages - complexed dsDNA stimulation, Related to Figure 2.

(2 Hz sampling)

*in vitro*

**M4.** Csf1r<sup>Cre</sup>GCaMP5<sup>fl</sup> reporter - MC38-H2B-mCherry tumor cells, Related to Figure 3.

(2 Hz sampling)

*in vivo*

**M5.** Csf1r<sup>Cre</sup>GCaMP5<sup>fl</sup> reporter - MC38-H2B-mCherry tumor cells, Related to Figure 5.

(2 Hz sampling)

*in vivo*

**M6a.** Csf1r<sup>Cre</sup>GCaMP5<sup>fl</sup> reporter - MC38-H2B-mCherry tumor cells, Related to Figure 3.

**M6b.** Csf1r<sup>Cre</sup>GCaMP5<sup>fl</sup> reporter - MC38-H2B-mCherry tumor cells, Related to Figure 3.

(2 Hz sampling)

*in vivo*
